# Supplementary material
Source: Springer Nature journal article supplement (https://www.springermedizin.de/resource/supplementary/12958_2008_497_MOESM2_ESM.pdf/9568150)

Placentome central region
  Edges of placentome
  Interplacentomal region
  Microplacentomes
  Placentomal fusion

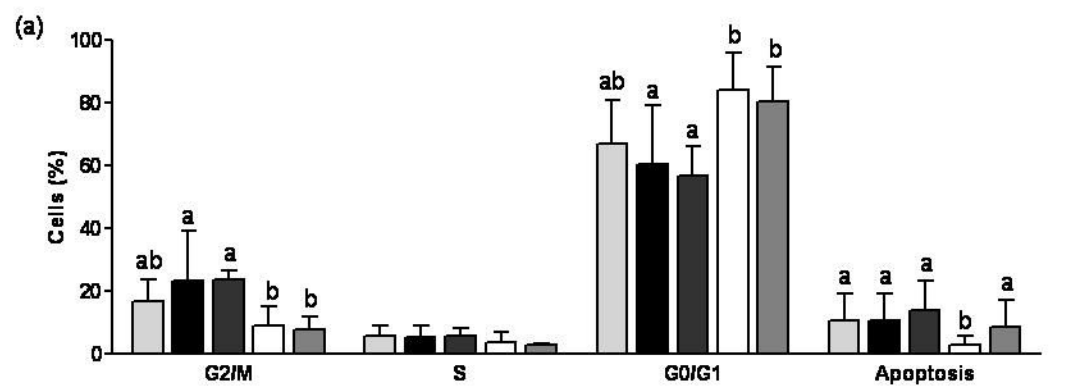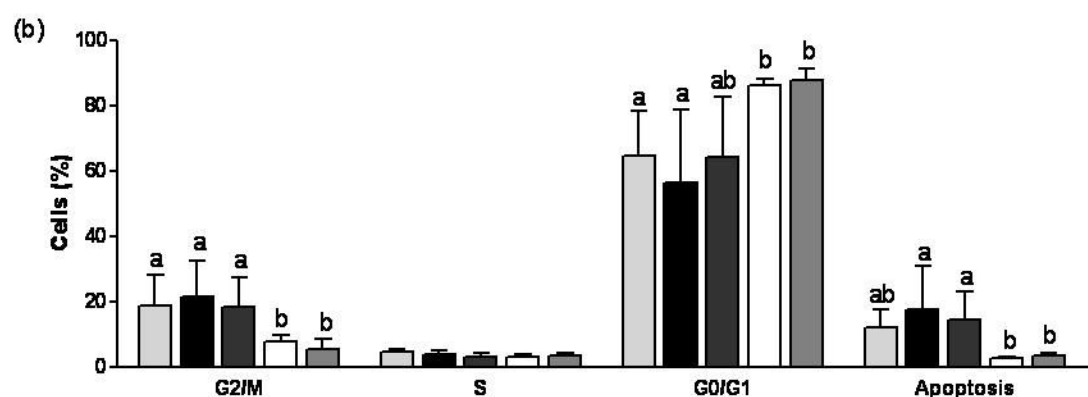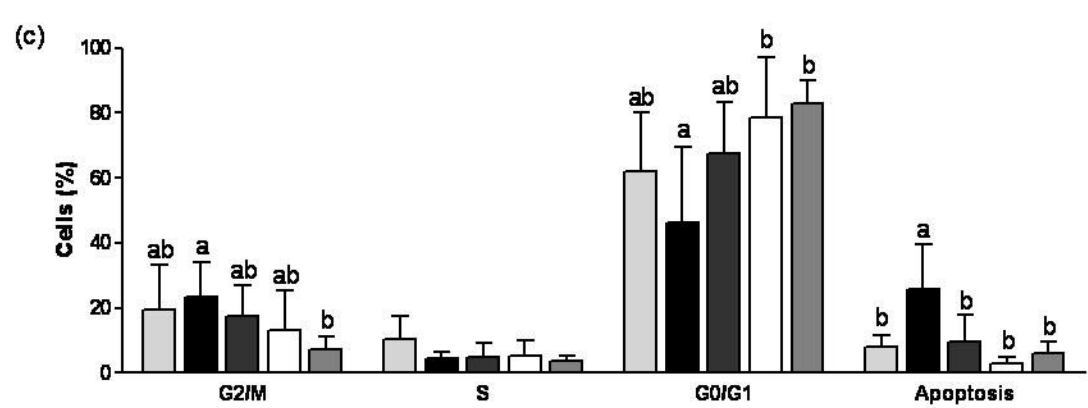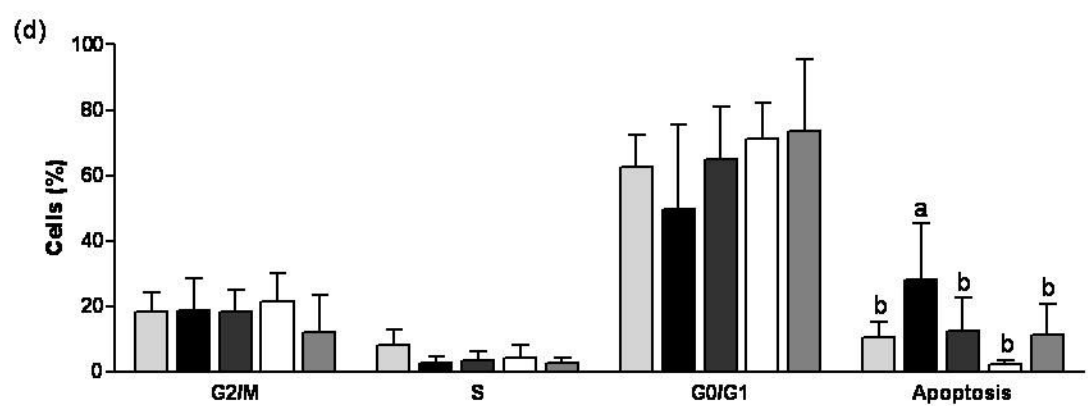

Supplement: MOESM2 [file 9568150]
